# Supplementary material for: Cause of death and potentially avoidable deaths in Australian adults with intellectual disability using retrospective linked data
Source: PubMed Central journal article supplement (PMC5306525; doi:10.1136/bmjopen-2016-013489), 2017-02-02
Supplement: bmjopen-2016-013489supp_table1.pdf [file bmjopen-2016-013489supp_table1.pdf]

**Supplementary Table 1: Age and sex specific mortality rate per 1000 persons, in people with and without ID**

| Age group   | Overall |            | Male   |            | Female |            |
|-------------|---------|------------|--------|------------|--------|------------|
|             | ID      | Comparison | ID     | Comparison | ID     | Comparison |
| 20-24       | 1.92    | 0.43       | 2.34   | 0.61       | 1.37   | 0.24       |
| 25-29       | 2.53    | 0.49       | 3.23   | 0.69       | 1.70   | 0.29       |
| 30-34       | 3.49    | 0.64       | 3.30   | 0.90       | 3.73   | 0.37       |
| 35-39       | 2.79    | 0.83       | 2.62   | 1.10       | 3.00   | 0.56       |
| 40-44       | 3.74    | 1.21       | 3.15   | 1.55       | 4.52   | 0.88       |
| 45-49       | 5.53    | 1.88       | 5.63   | 2.34       | 5.41   | 1.43       |
| 50-54       | 6.51    | 2.85       | 7.21   | 3.57       | 5.64   | 2.15       |
| 55-59       | 9.73    | 4.30       | 10.23  | 5.47       | 9.05   | 3.18       |
| 60-64       | 14.23   | 6.80       | 15.80  | 8.47       | 12.02  | 5.12       |
| 65-69       | 19.05   | 10.89      | 22.04  | 13.66      | 15.29  | 8.17       |
| 70-74       | 30.57   | 18.18      | 33.10  | 22.82      | 28.11  | 13.85      |
| 75-79       | 35.23   | 32.04      | 51.72  | 40.64      | 20.51  | 24.78      |
| 80-84       | 44.33   | 57.28      | 65.93  | 70.18      | 26.79  | 47.14      |
| 85 and over | 85.00   | 129.08     | 112.68 | 129.53     | 70.31  | 128.82     |
