# Supplementary material for: Cause of death and potentially avoidable deaths in Australian adults with intellectual disability using retrospective linked data
Source: PubMed Central journal article supplement (PMC5306525; doi:10.1136/bmjopen-2016-013489), 2017-02-02
Supplement: bmjopen-2016-013489supp_table2.pdf [file bmjopen-2016-013489supp_table2.pdf]

**Supplementary Table 2: Age-specific potentially avoidable death rate per 1000 persons, in people with and without ID**

| <b>Age group</b> | <b>ID ABS Convention</b> | <b>ID Revised</b> | <b>Comparison</b> |
|------------------|--------------------------|-------------------|-------------------|
| 20-24            | 0.40                     | 0.40              | 0.32              |
| 25-29            | 0.77                     | 0.88              | 0.35              |
| 30-34            | 0.75                     | 1.12              | 0.46              |
| 35-39            | 0.83                     | 0.89              | 0.55              |
| 40-44            | 0.99                     | 1.18              | 0.73              |
| 45-49            | 1.24                     | 1.59              | 1.01              |
| 50-54            | 2.11                     | 2.76              | 1.43              |
| 55-59            | 2.71                     | 3.21              | 2.03              |
| 60-64            | 5.17                     | 5.98              | 3.16              |
| 65-69            | 4.84                     | 6.13              | 5.15              |
| 70-74            | 15.63                    | 16.99             | 9.00              |
